# Supplementary material for: Observing local CO 2 sources using low-cost, near-surface urban monitors
Source: Copernicus journal article supplement (doi:10.5194/acp-2018-344), 2018-05-22
Supplement: Supplementary file 1 [file acp-2018-344-supplement.pdf]

*Supplement of*

**Observing local CO<sub>2</sub> sources using low-cost, near-surface urban monitors**

5 Alexis A. Shusterman et al.

*Correspondence to:* Ronald C. Cohen (rccohen@berkeley.edu)

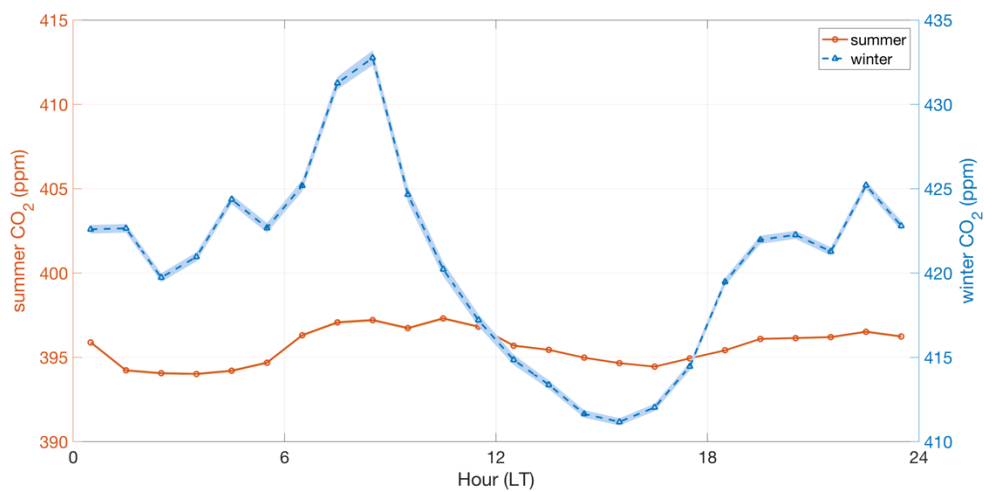

5 **Figure S1: Hourly median values of the network-wide, regional CO<sub>2</sub> signals calculated for summer (orange) and winter (blue) periods in 2013. Lighter colored curves indicate the standard error; note the difference in y-scale.**

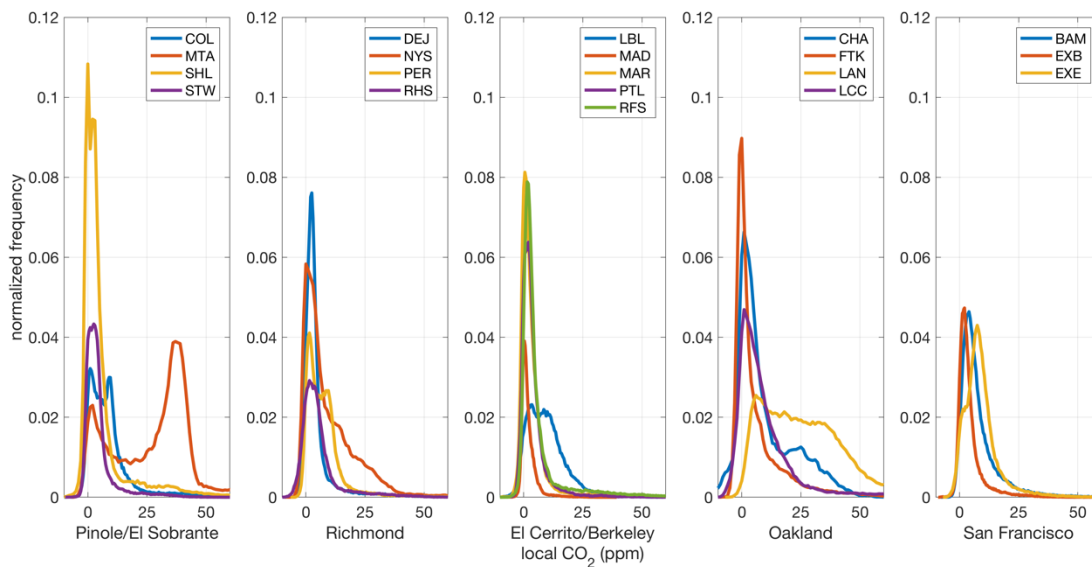

5 **Figure S2: Normalized distributions of local CO<sub>2</sub> concentrations observed during summer 2017.**

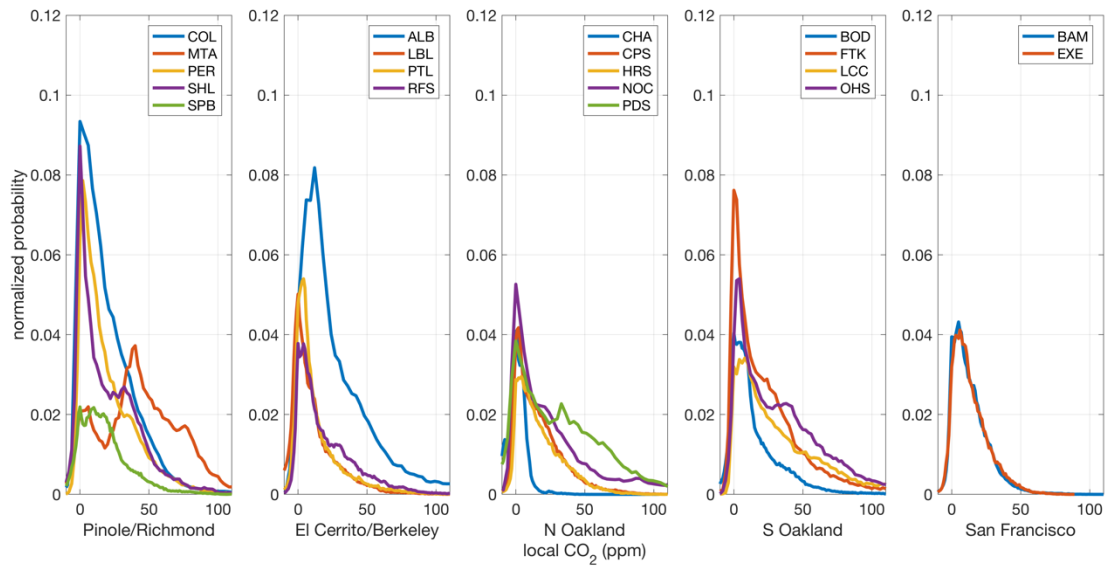

**Figure S3: Normalized distributions of local CO<sub>2</sub> concentrations observed during winter 2017.**

5

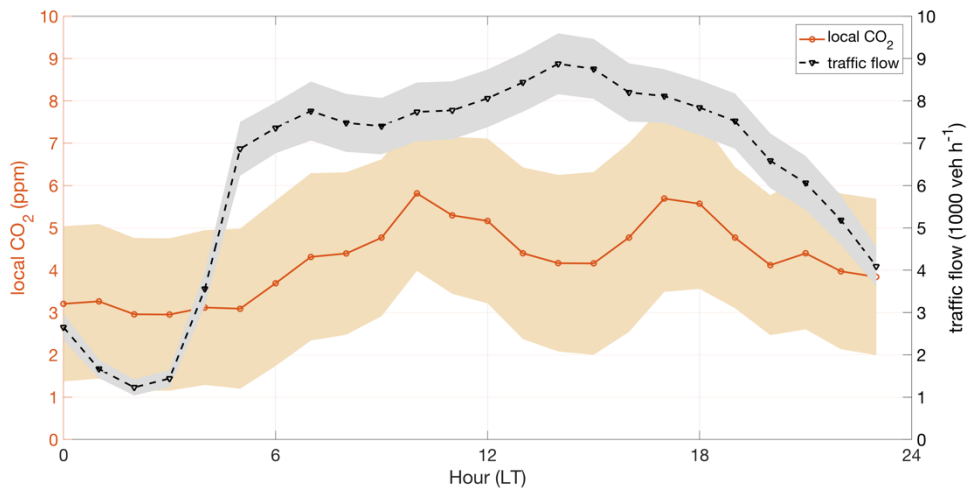

5 Figure S4: Hourly network-wide median local CO<sub>2</sub> and traffic flows observed during summer 2017. Lighter colored curves indicate standard error.

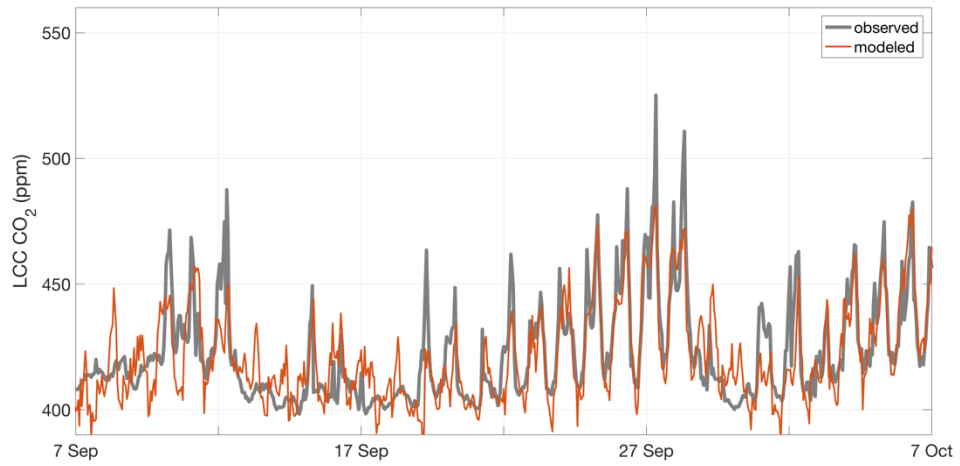

5 **Figure S5: Representative month of total CO<sub>2</sub> concentrations observed (thick gray curve) and modeled (thin orange curve) at LCC site using a multiple linear regression approach based on de Foy (2018).**
